# Supplementary material
Source: ML conference proceedings conference paper supplement (https://proceedings.mlr.press/v97/backurs19a.html)
Supplement: Supplementary file [file backurs19a-supp.pdf]

## A. Example of Our Fairlet Decomposition

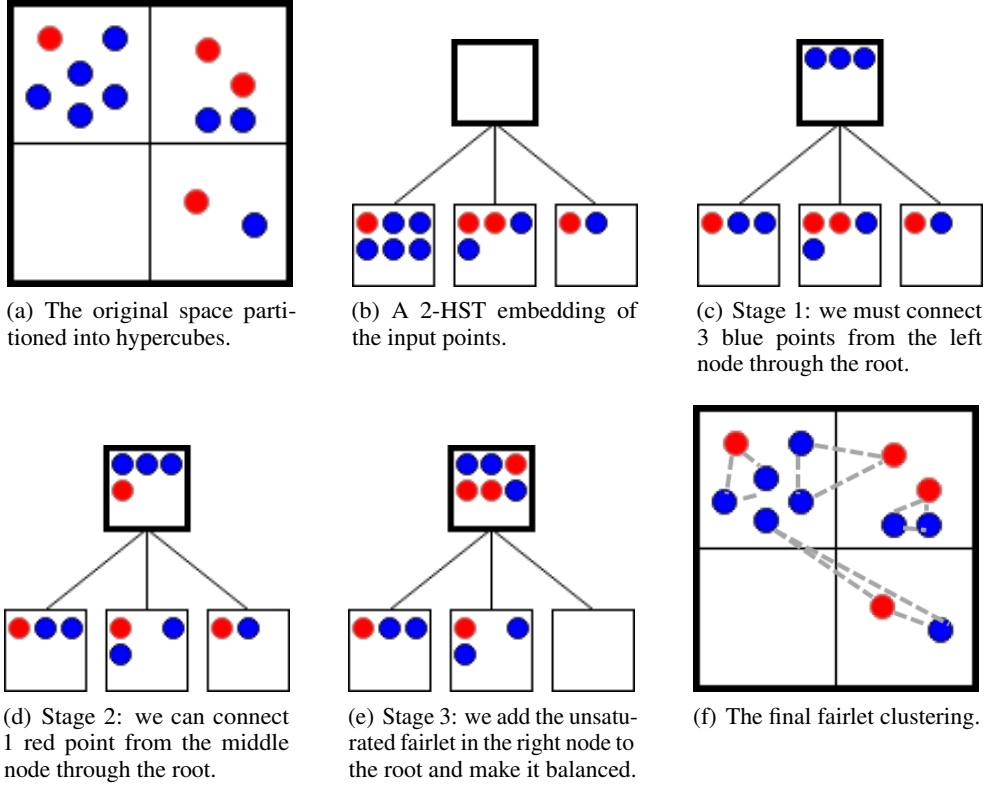

Figure 2. A run of our algorithm for (1,3)-fairlet decomposition on 8 blue points and 4 red points in  $\mathbb{R}^2$ . Steps (c)-(e) show the three stages of step 1 in FAIRLETDECOMPOSITION.

## B. Missing Proofs

*Proof of Lemma 4.3.* The proof is by induction on height of  $v$  in  $T$ . The base case is when  $v$  is a leaf node in  $T$  and the algorithm trivially finds an optimal solution in this case. Suppose that the induction hypothesis holds for all vertices of  $T$  at height  $h - 1$ . Here, we show that the statement holds for the vertices of  $T$  at height  $h$  as well.

Let  $\text{OPT}$  denote an optimal  $(r, b)$ -fairlet decomposition of the points in  $T(v)$  with respect to  $\text{cost}_{\text{med}}$ . Next, we decompose  $\text{OPT}$  into  $\gamma^d + 1$  parts:  $\{\text{OPT}_i\}_{i \in [\gamma^d]}$  and  $\text{OPT}_H$ . For each  $i \in [\gamma^d]$ ,  $\text{OPT}_i$  denotes the set of fairlets in  $\text{OPT}$  whose lca are in  $T(v_i)$ . Moreover,  $\text{OPT}_H$  denotes the set of heavy fairlets with respect to  $v$  and  $H_{\text{OPT}}$  denotes the set of heavy points with respect to  $v$  in  $\text{OPT}$ . Lastly,  $H_{\text{OPT}}^i := H_{\text{OPT}} \cap T(v_i)$  denotes the set of heavy points with respect to  $v$  in  $\text{OPT}$  that are contained in  $T(v_i)$ .

Let  $\text{SOL}$  denote the solution returned by  $\text{FAIRLETDECOMPOSITION}(v, r, b)$ . Similarly, we decompose  $\text{SOL}$  into  $\gamma^d + 1$  parts:  $\{\text{SOL}_i\}_{i \in [\gamma^d]}$  and  $\text{SOL}_H$ . Moreover,  $H_{\text{SOL}}$  denotes the set of heavy points with respect to  $v$  in  $\text{SOL}$  and for each  $i \in [\gamma^d]$ ,  $H_{\text{SOL}}^i := H_{\text{SOL}} \cap T(v_i)$  denotes the set of heavy points with respect to  $v$  in  $\text{SOL}$  that are contained in  $T(v_i)$ .

**Claim B.1.** For each  $i \in [\gamma^d]$ , there exists an  $(r, b)$ -fairlet decomposition of  $P_i \setminus H_{\text{SOL}}^i$  of cost at most  $\text{cost}(\text{OPT}_i) + (|H_{\text{OPT}}^i| + |H_{\text{SOL}}^i| \cdot (r + b)) \cdot (r^2 + b^2) \cdot \gamma^{h-1}$  where  $P_i$  is the set of points contained in  $T(v_i)$ .

Hence, by the induction hypothesis, for each  $i \in [\gamma^d]$ ,

$$\text{cost}(\text{SOL}_i) \leq c \cdot (r^2 + b^2) \cdot (\text{cost}(\text{OPT}_i) + (|H_{\text{OPT}}^i| + |H_{\text{SOL}}^i| \cdot (r + b)) \cdot (r^2 + b^2) \cdot \gamma^{h-1}). \quad (4)$$

Next, we bound the cost of SOL by Lemma 4.4 and (4) as follows:

$$\begin{aligned}
 \text{cost}(\text{SOL}) &= \text{cost}(\text{SOL}_H) + \sum_{i \in [\gamma^d]} \text{cost}(\text{SOL}_i) \\
 &\leq \eta_H \cdot (r^2 + b^2) \cdot \text{cost}(\text{OPT}_H) + c \cdot (r^2 + b^2) \cdot \left( \frac{\eta_H (r+b)^5}{\gamma} \cdot \text{cost}(\text{OPT}_H) + \sum_{i \in [k^d]} \text{cost}(\text{OPT}_i) \right) \\
 &\leq c \cdot (r^2 + b^2) \cdot \text{cost}(\text{OPT}) + \left( \eta_H - \frac{c}{2} \right) \cdot (r^2 + b^2) \cdot \text{cost}(\text{OPT}_H) \quad \triangleright \text{By setting } \gamma := 2\eta_H (r+b)^5 \\
 &\leq c \cdot (r^2 + b^2) \cdot \text{cost}(\text{OPT}) \triangleright c \geq 2\eta_H \quad \square
 \end{aligned}$$

*Proof of Claim B.1.* Consider the fairlet decomposition  $\text{OPT}_i$  on  $P_i \setminus H_{\text{OPT}}^i$ . A fairlet  $D \in \text{OPT}_i$  is *affected* if it contains a point  $p \in H_{\text{SOL}}^i$ .

We define the set of *affected points* as  $\bar{P}_i = H_{\text{OPT}}^i \cup \bigcup_{D \in \overline{\text{OPT}}_i} D$  to denote the union of the points in the affected fairlets (i.e.,  $\bigcup_{D \in \overline{\text{OPT}}_i} D$ ) and the set  $H_{\text{OPT}}^i$  (whose points do not belong to any of fairlets in  $\text{OPT}_i$ ).

Next, we bound the cost of the fairlet decomposition which is constructed by augmenting the set of fairlets  $\text{OPT}_i \setminus \overline{\text{OPT}}_i$  with the set of affected points  $\bar{P}_i$ .

Let  $Q_0$  denote the set of affected points  $\bar{P}_i$ . We augment the fairlet decomposition in three steps:

**Step 1.** In this step, we create as many  $(r, b)$ -balanced fairlets using the affected points  $Q_0$  only. Note that the contribution of each point involved in such fairlets is  $h_T(v_i)$  where  $h_T(v_i)$  denotes the distance of  $v_i$  from the leaves in  $T(v_i)$ . Let  $Q_1 \subseteq Q_0$  denote the set of affected points that do not join any fairlets at the end of this step. Note that all points in  $Q_1$  are of the same color  $c$ .

**Step 2:** Next, we add as many points of  $Q_1$  as possible to the existing fairlets in  $\text{OPT}_i \setminus \overline{\text{OPT}}_i$  while preserving the  $(r, b)$ -balanced property. Now the extra cost incurred by each points of  $Q_1$  that joins a fairlet in this step is at most  $(r+b) \cdot h_T(v_i)$ . Let  $Q_2 \subset Q_1$  be the set of points that do not belong to an fairlets by the end of the second phase. Note that at the end of this step, if  $Q_2$  is non-empty, then all fairlets are maximally-balanced  $c$ -dominant (a fairlet  $S$  is maximally-balanced  $c$ -dominant if (1) in  $S$ , the number of points of color  $c$  are larger than the number of points in color  $\bar{c}$ , (2) the set  $S$  is  $(r, b)$ -balanced, and (3) adding a point of color  $c$  to  $S$  makes it unbalanced).

**Step 3:** Finally, we show that by mixing the points of at most  $b \cdot |Q_2|$  existing fairlets with the set  $Q_2$ , we can find an  $(r, b)$ -balanced fairlet decomposition of the involved points and the contribution of each such point to the total cost is at most  $h_T(v_i)$ . Note that since the set of all points we are considering is  $(r, b)$ -balanced, not all of the so far constructed fairlets are saturated (i.e., has size exactly  $r+b$ ). In particular, we show that there exists a set of non-saturated fairlets  $\mathcal{X}$  of size at most  $b \cdot |Q_2|$  whose addition to  $Q_2$  constitutes a  $(r, b)$ -balanced set. For each fairlet  $D \in \mathcal{X}$ ,

$$|c_D| < \frac{r}{b} |\bar{c}_D| \Rightarrow b \cdot |c_D| \leq r \cdot |\bar{c}_D| - 1,$$

where  $c_D$  and  $\bar{c}_D$  respectively denotes the set of points of color  $c$  and  $\bar{c}$  in  $D$ . This implies that after picking at most  $|Q_2|$  non-saturated fairlets (i.e., the fairlets in  $\mathcal{X}$ ),

$$b \cdot |c_{\mathcal{X}}| \leq r \cdot |\bar{c}_{\mathcal{X}}| - b \cdot |Q_2| \Rightarrow b \cdot (|c_{\mathcal{X}}| + |Q_2|) \leq r \cdot |\bar{c}_{\mathcal{X}}|,$$

where  $c_{\mathcal{X}}$  and  $\bar{c}_{\mathcal{X}}$  respectively denotes the set of points of color  $c$  and  $\bar{c}$  in  $\bigcup_{D \in \mathcal{X}} D$ . Hence, the set of points  $Q_2 \cup \bigcup_{D \in \mathcal{X}} D$  is  $(r, b)$ -balanced. Moreover, the cost of this step is at most  $|Q_2| \cdot b \cdot (r+b) \cdot h_T(v_i)$ .

Altogether, there exists a fairlet decomposition of  $P_i \setminus H_{\text{SOL}}^i$  of cost at most

$$\begin{aligned}
 &\text{cost}(\text{OPT}_i) + |Q_0 \setminus Q_1| \cdot h_T(v_i) + |Q_1 \setminus Q_2| \cdot (r+b) \cdot h_T(v_i) + |Q_2| \cdot b \cdot (r+b) \cdot h_T(v_i) \\
 &\leq \text{cost}(\text{OPT}_i) + |Q_0| \cdot b \cdot (r+b) \cdot h_T(v_i) \\
 &\leq \text{cost}(\text{OPT}_i) + (|H_{\text{OPT}}^i| + |H_{\text{SOL}}^i| \cdot (r+b)) \cdot (r^2 + b^2) \cdot \gamma^{h-1} \quad \square
 \end{aligned}$$

*Proof of Theorem 3.4* For a pointset  $X$ , let  $\text{OPT}_{k\text{-fair}}(X)$  and  $\text{OPT}_{\text{fairlet}}(X)$  respectively denote an optimal  $(r, b)$ -fair  $k$ -median and an optimal  $(r, b)$ -fairlet decomposition of  $X$ . It is straightforward to see that for any set of point  $X$ ,  $\text{cost}(\text{OPT}_{\text{fairlet}}(X)) \leq \text{cost}(\text{OPT}_{k\text{-fair}}(X))$  and in particular,

$$\text{cost}(Q) \leq \alpha \cdot \text{cost}(\text{OPT}_{k\text{-fair}}(P)). \quad (5)$$

Let  $N$  denote the set of the centers of fairlets in  $Q$ . For a set of points  $X$ , let  $\text{OPT}_{k\text{-median}}(X)$  denotes an optimal  $k$ -median clustering of  $X$  (note that there is not fairness requirement). Since  $C \subseteq P$ , the optimal  $k$ -median cost of  $N$  is smaller than the optimal  $k$ -median cost of  $P$ . Since  $\overline{P}$  contains at most  $(r + b)$  copies of each point of  $N$ , by assigning all copies of each point  $p \in N$  in  $\overline{P}$  to the center of  $p$  in an optimal  $k$ -median clustering of  $N$ ,

$$\text{cost}(\text{OPT}_{k\text{-median}}(\overline{P})) \leq (r + b) \cdot \text{cost}(\text{OPT}_{k\text{-median}}(N)) \leq (r + b) \cdot \text{cost}(\text{OPT}_{k\text{-median}}(P)). \quad (6)$$

As CLUSTERFAIRLET returns a  $\beta$ -approximate  $k$ -median clustering of  $\overline{P}$ , and by (5)-(6), the cost of the clustering  $\mathcal{C}$  constructed by CLUSTERFAIRLET is

Since the distance of each point  $p_i \in P$  to the center of its cluster in  $\mathcal{C}^*$  is less than the sum of its distance to the center of its fairlet  $c_i$  in  $Q$  and the distance of  $c_i$  to its center in  $\mathcal{C}$ , we can bound the cost of  $\mathcal{C}^*$  in terms of the costs of  $\mathcal{C}$  and  $Q$  as follows:

$$\begin{aligned} \text{cost}(\mathcal{C}^*) &\leq \text{cost}(Q) + \text{cost}(\mathcal{C}) \\ &\leq \alpha \cdot \text{cost}(\text{OPT}_{k\text{-fair}}(P)) && \triangleright \text{By (5)} \\ &\quad + \beta \cdot \text{cost}(\text{OPT}_{k\text{-median}}(\overline{P})) \\ &\leq \alpha \cdot \text{cost}(\text{OPT}_{k\text{-fair}}(P)) \\ &\quad + \beta \cdot (r + b) \cdot \text{cost}(\text{OPT}_{k\text{-median}}(P)) && \triangleright \text{By (6)} \\ &\leq (\alpha + \beta \cdot (r + b)) \cdot \text{cost}(\text{OPT}_{k\text{-fair}}(P)) \end{aligned} \quad \square$$
